# Supplementary material for: Mechanism of formation and ion mobility separation of protomers and deprotomers of diaminobenzoic acids and aminophthalic acids
Source: Royal Society of Chemistry journal article supplement (doi:10.1039/d3cp01968c), 2023-01-01
Supplement: d3cp01968c1.pdf [file d3cp01968c1.pdf]

Supplementary Information for:

## Mechanism of formation and ion mobility separation of protomers and deprotomers of diaminobenzoic acids and aminophthalic acids

Younes Valadbeigi<sup>\*,a</sup>, Tim Causon<sup>\*,b</sup>

<sup>a</sup> Department of Chemistry, Faculty of Science, Imam Khomeini International University, Qazvin, Iran.

<sup>b</sup> University of Natural Resources and Life Sciences, Vienna, Department of Chemistry, Institute of Analytical Chemistry, Muthgasse 18, 1190 Vienna, Austria

\*Corresponding authors emails: valadbeigi@sci.ikiu.ac.ir; tim.causon@boku.ac.at

| Content                                                                                                          | page |
|------------------------------------------------------------------------------------------------------------------|------|
| <b>Figure S1.</b> Comparison of ESI-MS results for protomers of amino benzoic acids                              | S2   |
| <b>Table S1.</b> Calculated proton affinities (PA) and gas phase basicities (GB)                                 | S3   |
| <b>Figure S2.</b> Relative energies and calculated $CCS_{N2}$ values for protomers of [2,4-DABA+H] <sup>+</sup>  | S4   |
| <b>Figure S3.</b> Relative energies and calculated $CCS_{N2}$ values for protomers of [2,5-DABA+H] <sup>+</sup>  | S5   |
| <b>Figure S4.</b> Relative energies and calculated $CCS_{N2}$ values for protomers of [3,4-DABA+H] <sup>+</sup>  | S6   |
| <b>Figure S5.</b> Relative energies and calculated $CCS_{N2}$ values for protomers of [3,5-DABA+H] <sup>+</sup>  | S7   |
| <b>Figure S6.</b> Relative energies and calculated $CCS_{N2}$ values for protomers of [2ATP+H] <sup>+</sup>      | S8   |
| <b>Figure S7.</b> Relative energies and calculated $CCS_{N2}$ values for deprotomers of [2ATP-H] <sup>-</sup>    | S9   |
| <b>Figure S8.</b> Relative energies and calculated $CCS_{N2}$ values for protomers of [4AIP+H] <sup>+</sup>      | S10  |
| <b>Figure S9.</b> Relative energies and calculated $CCS_{N2}$ values for deprotomers of [4AIP-H] <sup>-</sup>    | S11  |
| <b>Figure S10.</b> Relative energies and calculated $CCS_{N2}$ values for protomers of [4AP+H] <sup>+</sup>      | S12  |
| <b>Figure S11.</b> Relative energies and calculated $CCS_{N2}$ values for deprotomers of [4AP-H] <sup>-</sup>    | S13  |
| <b>Figure S12.</b> Relative energies and calculated $CCS_{N2}$ values for protomers of [5AIP+H] <sup>+</sup>     | S14  |
| <b>Figure S13.</b> Relative energies and calculated $CCS_{N2}$ values for deprotomers of [5AIP-H] <sup>-</sup>   | S14  |
| <b>Figure S14.</b> Optimized structures of [2,4-DABA+H] <sup>+</sup> (H <sub>2</sub> O) <sub>1,2,3</sub> isomers | S15  |
| <b>Figure S15.</b> Stabilization of the 2,4-DABA protomers due to micro-hydration                                | S16  |
| <b>Figure S16.</b> Experimental mass and IM spectra for <i>para</i> -amino benzoic acid                          | S17  |
| <b>Figure S17.</b> <i>m/z</i> -selected IM spectra and corresponding MS results without and with FA              | S18  |
| <b>Figure S18.</b> HRMS fragment results for protomers of DABAs a CID voltage of 10 V                            |      |
| <b>Figure S19.</b> Resonance stabilization of the C-protomer of 3,5-DABA                                         | S19  |
| <b>Figure S20.</b> Mass spectra of DABAs ionized using APCI and ESI ion sources                                  | S20  |
| <b>Figure S21.</b> The IM and mass spectra of <i>p</i> -DAB and <i>m</i> -DAB ionized by ESI ion source          | S21  |
| <b>Figure S22.</b> Intensity of fragment ions of the protomers of DABA isomers vs CID voltage                    | S23  |
| <b>Figure S23.</b> mass spectrum of 3,5-DABA in negative mode and IM spectra for all DABAs                       | S24  |
| <b>Figure S24.</b> Relative Gibbs free energies of different isomers of [M-OH] <sup>+</sup> ions of APAs         | S25  |
| <b>Table S2.</b> The calculated $\Delta H$ and $\Delta G$ values for deprotonation of DABAs and APAs             | S26  |
| <b>Figure S25.</b> The <i>m/z</i> -selected IM spectra of [2ATP-H] <sup>-</sup> ion ionized in ESI and APCI      | S26  |

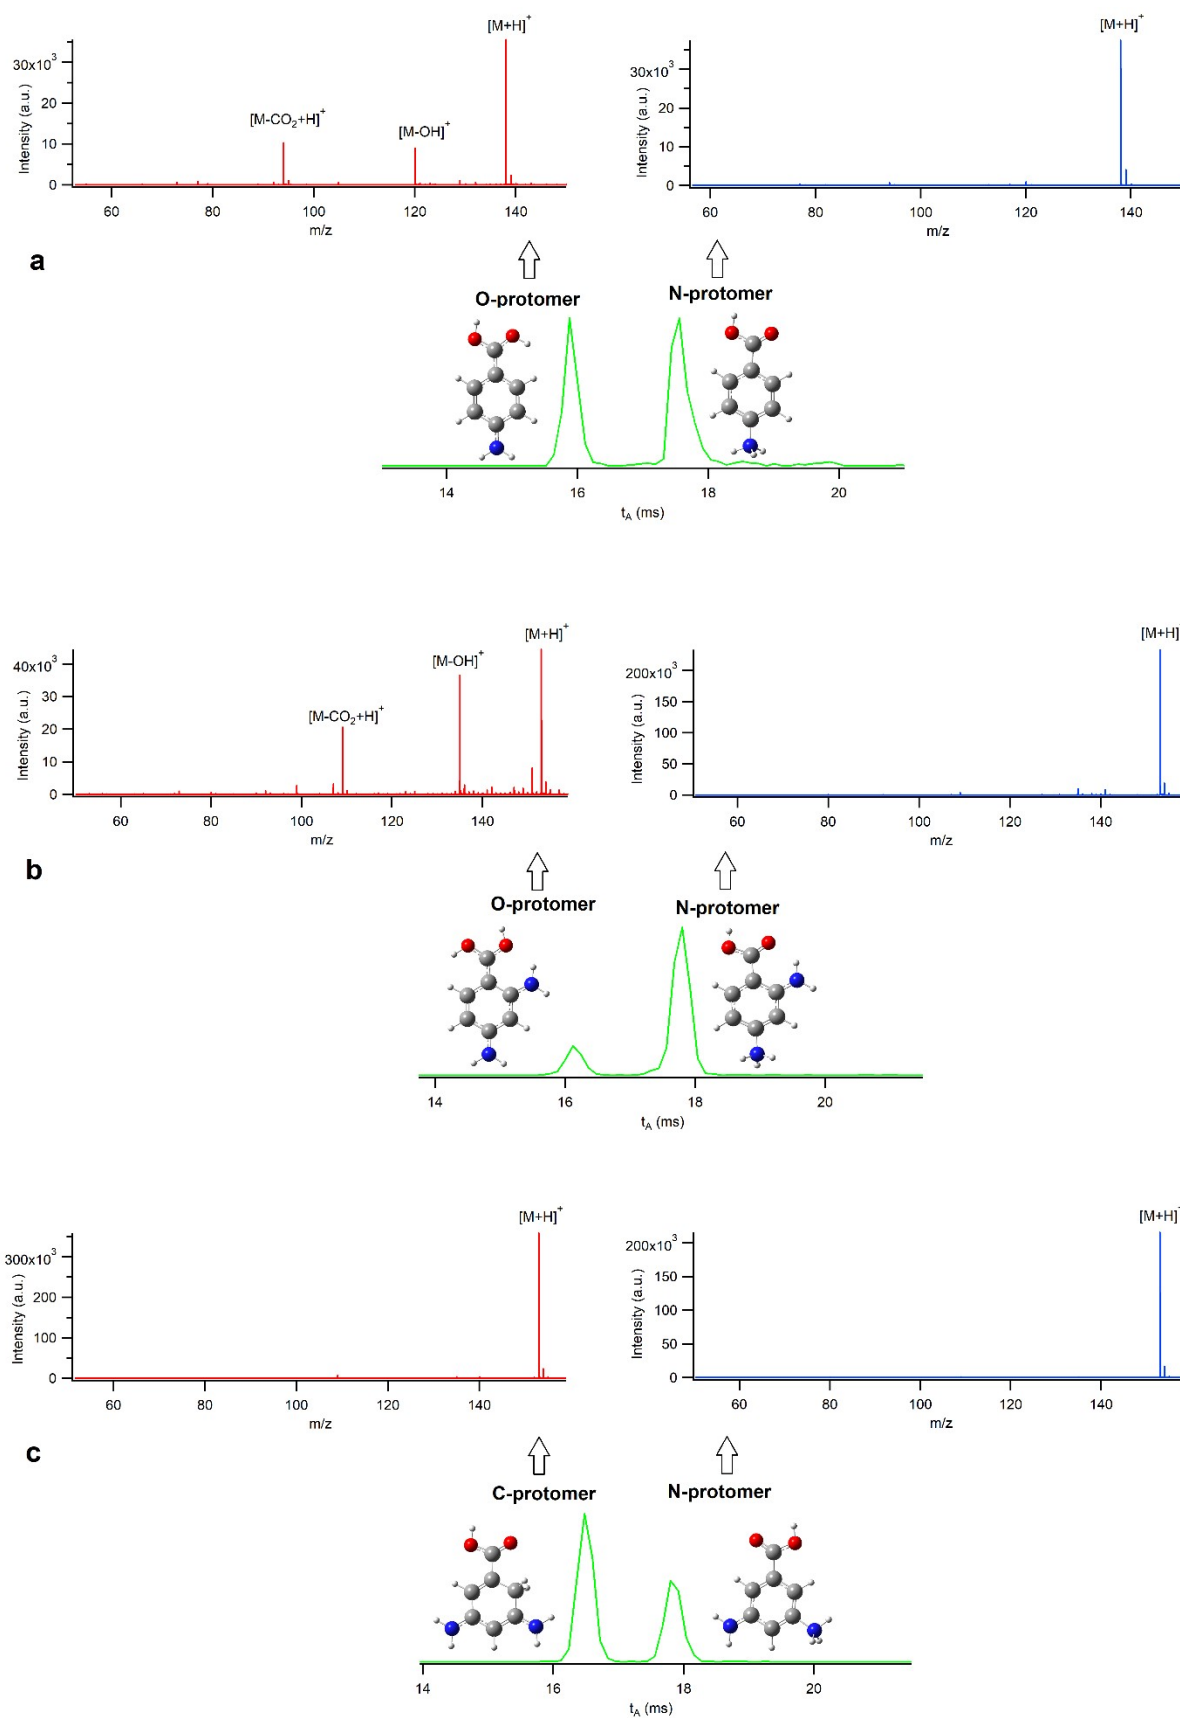

**Figure S1.** Comparison of ESI-MS results for protomers of (a) *p*-amino benzoic acid, (b) 2,4-DABA, and (c) 3,5-DABA acquired with standard transmission tuning.

**Tables S1.** Calculated proton affinities (PA) and gas phase basicities (GB) of nitrogen, oxygen, and carbon sites of amino benzoic acid derivatives. The most basic site has been considered in each case (marked with an asterisk). The PA and GB values are in kJ mol<sup>-1</sup>.

| Compound      | Structure                                                                           | Nitrogen atom |       | Oxygen of C=O |       | Carbon of ring |       |
|---------------|-------------------------------------------------------------------------------------|---------------|-------|---------------|-------|----------------|-------|
|               |                                                                                     | PA            | GB    | PA            | GB    | PA             | GB    |
| Benzene       |    |               |       |               |       | 769.1          | 740.2 |
| Aniline       |    |               |       |               |       | 892.6          | 861.5 |
| <i>p</i> -DAB |    | 922.5         | 901.2 |               |       | 893.1          | 863.2 |
| <i>m</i> -DAB |    | 906.2         | 881.7 |               |       | 961.4          | 930.2 |
| Benzoic acid  |    |               |       | 833.6         | 803.3 | 747.6          | 718.7 |
| <i>p</i> -ABA |    | 860.1         | 836.4 | 884.5         | 856.2 | 849.6          | 820.2 |
| <i>m</i> -ABA |    | 870.3         | 842.4 | 852.2         | 824.7 | 870.1          | 839.8 |
| <i>o</i> -ABA |   | 902.7         | 868.9 | 854.6         | 824.5 | 874.5          | 842.5 |
| 2,4-DABA      |  | 925.1         | 891.8 | 918.8         | 885.4 | 930.0          | 898.6 |
| 2,5-DABA      |  | 938.9         | 907.2 | 872.9         | 842.2 | 883.6          | 855.9 |
| 3,4-DABA      |  | 896.3         | 864.7 | 889.4         | 859.9 | 871.5          | 841.6 |
| 3,5-DABA      |  | 889.9         | 868.4 | 863.9         | 837.2 | 943.9          | 912.9 |
| 2ATP          |  | 891.4         | 856.9 | 838.6         | 807.5 | 858.2          | 826.3 |
| 4AIP          |  | 876.8         | 842.7 | 870.1         | 840.2 | 835.4          | 804.6 |
| 4AP           |  | 849.9         | 823.9 | 940.0         | 903.1 | 837.7          | 808.7 |
| 5AIP          |  | 856.7         | 831.0 | 840.7         | 813.2 | 845.6          | 816.6 |

|                         |                                                                                   |                                                                                   |                                                                                   |                                                                                     |                                                                                     |
|-------------------------|-----------------------------------------------------------------------------------|-----------------------------------------------------------------------------------|-----------------------------------------------------------------------------------|-------------------------------------------------------------------------------------|-------------------------------------------------------------------------------------|
|                         | 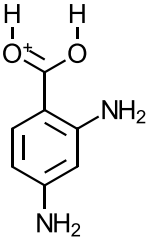 |  |  |  |  |
|                         | [2,4+H] <sup>+</sup> -a                                                           | [2,4+H] <sup>+</sup> -b                                                           | [2,4+H] <sup>+</sup> -c                                                           | [2,4+H] <sup>+</sup> -d                                                             | [2,4+H] <sup>+</sup> -e                                                             |
| Gas phase               | 48.7                                                                              | 13.2                                                                              | 32.8                                                                              | 6.8                                                                                 | 49.3                                                                                |
| Water                   | 51.9                                                                              | NA                                                                                | 49.1                                                                              | 0.0                                                                                 | 11.1                                                                                |
| Methanol                | 52.3                                                                              | NA                                                                                | 48.7                                                                              | 0.0                                                                                 | 12.6                                                                                |
| <b>CCS<sub>N2</sub></b> | <b>126.0</b>                                                                      | <b>123.8</b>                                                                      | <b>125.2</b>                                                                      | <b>129.7</b>                                                                        | <b>139.6</b>                                                                        |

  

|                         |                                                                                    |                                                                                    |                                                                                    |                                                                                      |                                                                                      |
|-------------------------|------------------------------------------------------------------------------------|------------------------------------------------------------------------------------|------------------------------------------------------------------------------------|--------------------------------------------------------------------------------------|--------------------------------------------------------------------------------------|
|                         |  |  |  |  |  |
|                         | [2,4+H] <sup>+</sup> -f                                                            | [2,4+H] <sup>+</sup> -g                                                            | [2,4+H] <sup>+</sup> -h                                                            | [2,4+H] <sup>+</sup> -i                                                              | [2,4+H] <sup>+</sup> -j                                                              |
| Gas phase               | 107.3                                                                              | 26.6                                                                               | 0.0                                                                                | 148.9                                                                                | 6.2                                                                                  |
| Water                   | 35.5                                                                               | 11.6                                                                               | 10.1                                                                               | 154.5                                                                                | 7.8                                                                                  |
| Methanol                | 36.5                                                                               | 12.3                                                                               | 9.8                                                                                | 153.7                                                                                | 7.7                                                                                  |
| <b>CCS<sub>N2</sub></b> | <b>142.1</b>                                                                       | <b>133.7</b>                                                                       | <b>125.6</b>                                                                       | <b>125.7</b>                                                                         | <b>127.9</b>                                                                         |

**Figure S2.** Relative Gibbs free energies and trajectory method-calculated CCS<sub>N2</sub> values for possible protomers of [2,4-DABA+H]<sup>+</sup>. Tomasi's Polarized Continuum Model (PCM) was used for calculations in solvents water and methanol. Gibbs energies are in kJ mol<sup>-1</sup>. Note: for NA, the protomer [2,4+H]<sup>+</sup>-b was converted to the most stable isomer [2,4+H]<sup>+</sup>-d during the structural optimization in the solvents.

|                         |                         |                         |                         |                         |                         |
|-------------------------|-------------------------|-------------------------|-------------------------|-------------------------|-------------------------|
|                         |                         |                         |                         |                         |                         |
|                         | [2,5+H] <sup>+</sup> -a | [2,5+H] <sup>+</sup> -b | [2,5+H] <sup>+</sup> -c | [2,5+H] <sup>+</sup> -d | [2,5+H] <sup>+</sup> -e |
| Gas phase               | 83.3                    | 64.9                    | 0.0                     | 34.8                    | 25.1                    |
| Water                   | 90.7                    | 86.4                    | 6.0                     | 24.6                    | 16.3                    |
| Methanol                | 89.4                    | 84.8                    | 4.8                     | 24.2                    | 15.7                    |
| <b>CCS<sub>N2</sub></b> | <b>128.1</b>            | <b>125.0</b>            | <b>129.9</b>            | <b>129.2</b>            | <b>132.8</b>            |

  

|                         |                         |                         |                         |                         |                         |
|-------------------------|-------------------------|-------------------------|-------------------------|-------------------------|-------------------------|
|                         |                         |                         |                         |                         |                         |
|                         | [2,5+H] <sup>+</sup> -f | [2,5+H] <sup>+</sup> -g | [2,5+H] <sup>+</sup> -h | [2,5+H] <sup>+</sup> -i | [2,5+H] <sup>+</sup> -j |
| Gas phase               | 25.6                    | 33.2                    | 91.2                    | 51.3                    | 55.4                    |
| Water                   | 0.0                     | 5.5                     | 95.3                    | 51.1                    | 71.8                    |
| Methanol                | 0.0                     | 5.2                     | 94.8                    | 50.4                    | 70.3                    |
| <b>CCS<sub>N2</sub></b> | <b>137.0</b>            | <b>137.7</b>            | <b>128.6</b>            | <b>129.7</b>            | <b>125.7</b>            |

**Figure S3.** Relative Gibbs free energies and calculated  $CCS_{N_2}$  values for possible protomers of [2,5-DABA+H]<sup>+</sup>. Tomasi's Polarized Continuum Model (PCM) was used for calculations in solvents water and methanol. Gibbs energies are in kJ mol<sup>-1</sup>.

|                         |                                                                                   |                                                                                   |                                                                                   |                                                                                     |                                                                                     |
|-------------------------|-----------------------------------------------------------------------------------|-----------------------------------------------------------------------------------|-----------------------------------------------------------------------------------|-------------------------------------------------------------------------------------|-------------------------------------------------------------------------------------|
|                         | 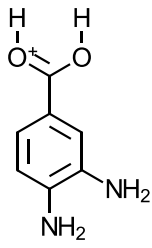 |  |  |  |  |
|                         | [3,4+H] <sup>+</sup> -a                                                           | [3,4+H] <sup>+</sup> -b                                                           | [3,4+H] <sup>+</sup> -c                                                           | [3,4+H] <sup>+</sup> -d                                                             | [3,4+H] <sup>+</sup> -e                                                             |
| Gas phase               | 21.5                                                                              | 4.8                                                                               | 27.6                                                                              | 3.4                                                                                 | 4.6                                                                                 |
| Water                   | 59.8                                                                              | 55.4                                                                              | 65.8                                                                              | 2.0                                                                                 | 8.7                                                                                 |
| Methanol                | 57.9                                                                              | 53.5                                                                              | 64.3                                                                              | 2.6                                                                                 | 8.1                                                                                 |
| <b>CCS<sub>N2</sub></b> | <b>126.9</b>                                                                      | <b>125.5</b>                                                                      | <b>124.0</b>                                                                      | <b>134.1</b>                                                                        | <b>135.3</b>                                                                        |

  

|                         |                                                                                    |                                                                                    |                                                                                    |                                                                                      |                                                                                      |
|-------------------------|------------------------------------------------------------------------------------|------------------------------------------------------------------------------------|------------------------------------------------------------------------------------|--------------------------------------------------------------------------------------|--------------------------------------------------------------------------------------|
|                         |  |  |  |  |  |
|                         | [3,4+H] <sup>+</sup> -f                                                            | [3,4+H] <sup>+</sup> -g                                                            | [3,4+H] <sup>+</sup> -h                                                            | [3,4+H] <sup>+</sup> -i                                                              | [3,4+H] <sup>+</sup> -j                                                              |
| Gas phase               | 2.8                                                                                | 0.0                                                                                | 23.1                                                                               | 31.6                                                                                 | 33.5                                                                                 |
| Water                   | 7.4                                                                                | 0.0                                                                                | 58.1                                                                               | 57.8                                                                                 | 58.4                                                                                 |
| Methanol                | 7.3                                                                                | 0.0                                                                                | 56.6                                                                               | 56.5                                                                                 | 57.3                                                                                 |
| <b>CCS<sub>N2</sub></b> | <b>135.6</b>                                                                       | <b>134.9</b>                                                                       | <b>127.4</b>                                                                       | <b>129.2</b>                                                                         | <b>128.3</b>                                                                         |

**Figure S4.** Relative Gibbs free energies and calculated  $CCS_{N2}$  values for possible protomers of [3,4-DABA+H]<sup>+</sup>. Tomasi's Polarized Continuum Model (PCM) was used for calculations in solvents water and methanol. Gibbs energies are in kJ mol<sup>-1</sup>.

|                         |                                                                                   |                                                                                   |                                                                                    |                                                                                     |                                                                                     |
|-------------------------|-----------------------------------------------------------------------------------|-----------------------------------------------------------------------------------|------------------------------------------------------------------------------------|-------------------------------------------------------------------------------------|-------------------------------------------------------------------------------------|
|                         | 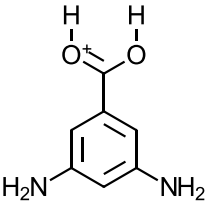 |  |  |  |  |
|                         | [3,5+H] <sup>+</sup> -a                                                           | [3,5+H] <sup>+</sup> -b                                                           | [3,5+H] <sup>+</sup> -c                                                            | [3,5+H] <sup>+</sup> -d                                                             | [3,5+H] <sup>+</sup> -e                                                             |
| Gas phase               | 96.0                                                                              | 75.6                                                                              | 88.7                                                                               | 44.5                                                                                | 45.9                                                                                |
| Water                   | 93.0                                                                              | 85.9                                                                              | 92.9                                                                               | 10.2                                                                                | 11.0                                                                                |
| Methanol                | 95.5                                                                              | 86.0                                                                              | 93.6                                                                               | 12.2                                                                                | 12.6                                                                                |
| <b>CCS<sub>N2</sub></b> | <b>130.0</b>                                                                      | <b>125.0</b>                                                                      | <b>123.4</b>                                                                       | <b>140.8</b>                                                                        | <b>140.3</b>                                                                        |

  

|                         |                                                                                    |                                                                                    |                                                                                     |                                                                                      |
|-------------------------|------------------------------------------------------------------------------------|------------------------------------------------------------------------------------|-------------------------------------------------------------------------------------|--------------------------------------------------------------------------------------|
|                         |  |  |  |  |
|                         | [3,5+H] <sup>+</sup> -f                                                            | [3,5+H] <sup>+</sup> -g                                                            | [3,5+H] <sup>+</sup> -h                                                             | [3,5+H] <sup>+</sup> -i                                                              |
| Gas phase               | 97.2                                                                               | 86.6                                                                               | 31.2                                                                                | 0.0                                                                                  |
| Water                   | 26.9                                                                               | 26.4                                                                               | 26.6                                                                                | 0.0                                                                                  |
| Methanol                | 29.3                                                                               | 28.8                                                                               | 27.8                                                                                | 0.0                                                                                  |
| <b>CCS<sub>N2</sub></b> | <b>143.9</b>                                                                       | <b>141.5</b>                                                                       | <b>130.0</b>                                                                        | <b>129.2</b>                                                                         |

**Figure S5.** Relative Gibbs free energies and calculated  $CCS_{N2}$  values for possible protomers of [3,5-DABA+H]<sup>+</sup>. Polarized Continuum Model (PCM) was used for calculations in solvents water and methanol. Gibbs energies are in kJ mol<sup>-1</sup>.

|                         |                                                                                   |                                                                                   |                                                                                   |                                                                                     |                                                                                     |
|-------------------------|-----------------------------------------------------------------------------------|-----------------------------------------------------------------------------------|-----------------------------------------------------------------------------------|-------------------------------------------------------------------------------------|-------------------------------------------------------------------------------------|
|                         | 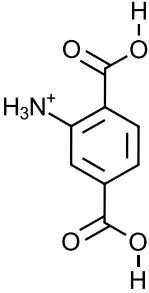 |  |  |  |  |
|                         | [2ATP+H] <sup>+</sup> -a                                                          | [2ATP+H] <sup>+</sup> -b                                                          | [2ATP+H] <sup>+</sup> -c                                                          | [2ATP+H] <sup>+</sup> -d                                                            | [2ATP+H] <sup>+</sup> -e                                                            |
| Gas phase               | 0.0                                                                               | 3.2                                                                               | 71.8                                                                              | 55.8                                                                                | 68.3                                                                                |
| Water                   | 0.0                                                                               | 0.0                                                                               | 76.4                                                                              | 73.2                                                                                | 68.9                                                                                |
| Methanol                | 0.0                                                                               | 0.1                                                                               | 75.7                                                                              | 72.0                                                                                | 68.4                                                                                |
| <b>CCS<sub>N2</sub></b> | <b>139.6</b>                                                                      | <b>140.4</b>                                                                      | <b>139.9</b>                                                                      | <b>135.1</b>                                                                        | <b>138.9</b>                                                                        |

  

|                         |                                                                                    |                                                                                    |                                                                                    |                                                                                      |
|-------------------------|------------------------------------------------------------------------------------|------------------------------------------------------------------------------------|------------------------------------------------------------------------------------|--------------------------------------------------------------------------------------|
|                         |  |  |  |  |
|                         | [2ATP+H] <sup>+</sup> -f                                                           | [2ATP+H] <sup>+</sup> -g                                                           | [2ATP+H] <sup>+</sup> -h                                                           | [2ATP+H] <sup>+</sup> -i                                                             |
| Gas phase               | 49.4                                                                               | 30.6                                                                               | 135.9                                                                              | 42.7                                                                                 |
| Water                   | 66.2                                                                               | 51.9                                                                               | 152.3                                                                              | 59.4                                                                                 |
| Methanol                | 65.7                                                                               | 51.3                                                                               | 151.1                                                                              | 59.1                                                                                 |
| <b>CCS<sub>N2</sub></b> | <b>135.9</b>                                                                       | <b>134.5</b>                                                                       | <b>134.3</b>                                                                       | <b>136.1</b>                                                                         |

**Figure S6.** Relative Gibbs free energies and calculated  $CCS_{N2}$  values for possible protomers of  $[2ATP+H]^+$ . Polarized Continuum Model (PCM) was used for calculations in solvents water and methanol. Gibbs energies are in  $\text{kJ mol}^{-1}$ .



|                         |                                                                                   |                                                                                    |
|-------------------------|-----------------------------------------------------------------------------------|------------------------------------------------------------------------------------|
|                         | 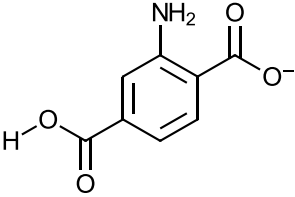 |  |
|                         | [2ATP-H] <sup>-</sup> -a                                                          | [2ATP-H] <sup>-</sup> -b                                                           |
| Gas phase               | 0.8                                                                               | 0.0                                                                                |
| Water                   | 2.0                                                                               | 2.1                                                                                |
| Methanol                | 1.9                                                                               | 1.8                                                                                |
| <b>CCS<sub>N2</sub></b> | <b>144.0</b>                                                                      | <b>144.2</b>                                                                       |

  

|                         |                                                                                   |                                                                                    |
|-------------------------|-----------------------------------------------------------------------------------|------------------------------------------------------------------------------------|
|                         |  |  |
|                         | [2ATP-H] <sup>-</sup> -c                                                          | [2ATP-H] <sup>-</sup> -d                                                           |
| Gas phase               | 11.5                                                                              | 18.5                                                                               |
| Water                   | 0.0                                                                               | 8.5                                                                                |
| Methanol                | 0.0                                                                               | 8.9                                                                                |
| <b>CCS<sub>N2</sub></b> | <b>147.2</b>                                                                      | <b>147.3</b>                                                                       |

**Figure S7.** Relative Gibbs free energies and calculated  $CCS_{N2}$  values for possible deprotomers of [2ATP-H]<sup>-</sup>. Polarized Continuum Model (PCM) was used for calculations in solvents water and methanol. Gibbs energies are in kJ mol<sup>-1</sup>.

|                         |                                                                                   |                                                                                   |                                                                                   |                                                                                     |                                                                                     |
|-------------------------|-----------------------------------------------------------------------------------|-----------------------------------------------------------------------------------|-----------------------------------------------------------------------------------|-------------------------------------------------------------------------------------|-------------------------------------------------------------------------------------|
|                         | 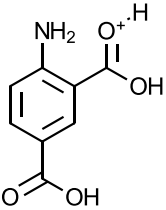 |  |  |  |  |
|                         | [4AIP+H] <sup>+</sup> -a                                                          | [4AIP+H] <sup>+</sup> -b                                                          | [4AIP+H] <sup>+</sup> -c                                                          | [4AIP+H] <sup>+</sup> -d                                                            | [4AIP+H] <sup>+</sup> -e                                                            |
| Gas phase               | 56.3                                                                              | 36.1                                                                              | 18.7                                                                              | 2.5                                                                                 | 0.0                                                                                 |
| Water                   | 56.1                                                                              | 58.2                                                                              | 43.2                                                                              | 41.8                                                                                | 1.0                                                                                 |
| Methanol                | 55.6                                                                              | 57.5                                                                              | 42.7                                                                              | 40.9                                                                                | 1.0                                                                                 |
| <b>CCS<sub>N2</sub></b> | <b>140.2</b>                                                                      | <b>136.5</b>                                                                      | <b>135.4</b>                                                                      | <b>133.0</b>                                                                        | <b>141.1</b>                                                                        |

  

|                         |                                                                                    |                                                                                    |                                                                                     |                                                                                      |
|-------------------------|------------------------------------------------------------------------------------|------------------------------------------------------------------------------------|-------------------------------------------------------------------------------------|--------------------------------------------------------------------------------------|
|                         |  |  |  |  |
|                         | [4AIP+H] <sup>+</sup> -f                                                           | [4AIP+H] <sup>+</sup> -g                                                           | [4AIP+H] <sup>+</sup> -h                                                            | [4AIP+H] <sup>+</sup> -i                                                             |
| Gas phase               | 0.4                                                                                | 146.1                                                                              | 135.3                                                                               | 38.2                                                                                 |
| Water                   | 0.0                                                                                | 166.1                                                                              | 162.2                                                                               | 56.5                                                                                 |
| Methanol                | 0.0                                                                                | 166.6                                                                              | 161.7                                                                               | 56.1                                                                                 |
| <b>CCS<sub>N2</sub></b> | <b>140.4</b>                                                                       | <b>133.6</b>                                                                       | <b>133.7</b>                                                                        | <b>135.0</b>                                                                         |

**Figure S8.** Relative Gibbs free energies and calculated  $CCS_{N2}$  values for possible protomers of  $[4AIP+H]^+$ . Polarized Continuum Model (PCM) was used for calculations in solvents water and methanol. Gibbs energies are in  $\text{kJ mol}^{-1}$ .

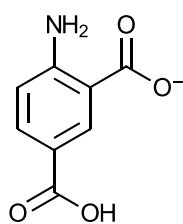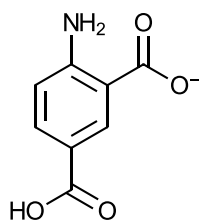

|                         | [4AIP-H] <sup>-</sup> -a | [4AIP-H] <sup>-</sup> -b |
|-------------------------|--------------------------|--------------------------|
| Gas phase               | 0.0                      | 4.0                      |
| Water                   | 0.0                      | 0.4                      |
| Methanol                | 0.0                      | 0.5                      |
| <b>CCS<sub>N2</sub></b> | <b>144.0</b>             | <b>144.2</b>             |

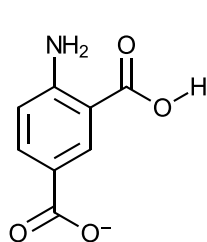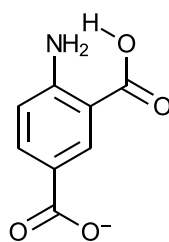

|                         | [4AIP-H] <sup>-</sup> -c | [4AIP-H] <sup>-</sup> -d |
|-------------------------|--------------------------|--------------------------|
| Gas phase               | 31.2                     | 49.4                     |
| Water                   | 9.1                      | 23.9                     |
| Methanol                | 9.5                      | 24.7                     |
| <b>CCS<sub>N2</sub></b> | <b>148.5</b>             | <b>149.2</b>             |

**Figure S9.** Relative Gibbs free energies and calculated CCS<sub>N2</sub> values for possible deprotomers of [4AIP-H]<sup>-</sup>. Polarized Continuum Model (PCM) was used for calculations in solvents water and methanol. Gibbs energies are in kJ mol<sup>-1</sup>.

|                         |                                                                                   |                                                                                   |                                                                                    |                                                                                     |
|-------------------------|-----------------------------------------------------------------------------------|-----------------------------------------------------------------------------------|------------------------------------------------------------------------------------|-------------------------------------------------------------------------------------|
|                         | 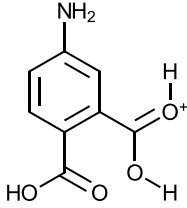 |  |  |  |
|                         | [4AP+H] <sup>+</sup> -a                                                           | [4AP+H] <sup>+</sup> -b                                                           | [4AP+H] <sup>+</sup> -c                                                            | [4AP+H] <sup>+</sup> -d                                                             |
| Gas phase               | 68.2                                                                              | 0.0                                                                               | 79.2                                                                               | 105.1                                                                               |
| Water                   | 57.8                                                                              | 5.4                                                                               | 0.0                                                                                | 3.1                                                                                 |
| Methanol                | 53.9                                                                              | 2.8                                                                               | 0.0                                                                                | 4.2                                                                                 |
| <b>CCS<sub>N2</sub></b> | <b>129.6</b>                                                                      | <b>128.7</b>                                                                      | <b>148.3</b>                                                                       | <b>149.8</b>                                                                        |

  

|                         |                                                                                   |                                                                                   |                                                                                    |                                                                                     |
|-------------------------|-----------------------------------------------------------------------------------|-----------------------------------------------------------------------------------|------------------------------------------------------------------------------------|-------------------------------------------------------------------------------------|
|                         |  |  |  |  |
|                         | [4AP+H] <sup>+</sup> -e                                                           | [4AP+H] <sup>+</sup> -f                                                           | [4AP+H] <sup>+</sup> -g                                                            | [4AP+H] <sup>+</sup> -h                                                             |
| Gas phase               | 94.2                                                                              | 182.2                                                                             | 94.4                                                                               | 97.2                                                                                |
| Water                   | 2.9                                                                               | 155.9                                                                             | 51.6                                                                               | 55.2                                                                                |
| Methanol                | 2.1                                                                               | 154.5                                                                             | 50.3                                                                               | 54.2                                                                                |
| <b>CCS<sub>N2</sub></b> | <b>148.3</b>                                                                      | <b>134.3</b>                                                                      | <b>138.2</b>                                                                       | <b>138.3</b>                                                                        |

**Figure S10.** Relative Gibbs free energies and calculated  $CCS_{N2}$  values for possible protomers of  $[4AP+H]^+$ . Polarized Continuum Model (PCM) was used for calculations in solvents water and methanol. Gibbs energies are in  $\text{kJ mol}^{-1}$ .

|                         |                                                                                   |                                                                                   |
|-------------------------|-----------------------------------------------------------------------------------|-----------------------------------------------------------------------------------|
|                         | 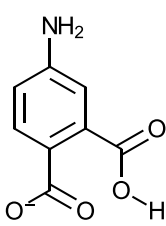 |  |
|                         | [4AP-H] <sup>-</sup> -a                                                           | [4AP-H] <sup>-</sup> -b                                                           |
| Gas phase               | 81.5                                                                              | 0.0                                                                               |
| Water                   | 41.1                                                                              | 0.0                                                                               |
| Methanol                | 42.7                                                                              | 0.0                                                                               |
| <b>CCS<sub>N2</sub></b> | <b>146.8</b>                                                                      | <b>139.9</b>                                                                      |

  

|                         |                                                                                   |                                                                                   |
|-------------------------|-----------------------------------------------------------------------------------|-----------------------------------------------------------------------------------|
|                         |  |  |
|                         | [4AP-H] <sup>-</sup> -c                                                           | [4AP-H] <sup>-</sup> -d                                                           |
| Gas phase               | 77.1                                                                              | 377.1                                                                             |
| Water                   | 35.6                                                                              | 113.5                                                                             |
| Methanol                | 37.1                                                                              | 120.7                                                                             |
| <b>CCS<sub>N2</sub></b> | <b>145.8</b>                                                                      | <b>180.1</b>                                                                      |

**Figure S11.** Relative Gibbs free energies and calculated  $CCS_{N2}$  values for possible deprotomers of [4AP-H]<sup>-</sup>. Polarized Continuum Model (PCM) was used for calculations in solvents water and methanol. Gibbs energies are in kJ mol<sup>-1</sup>.

|                         |                          |                          |                          |
|-------------------------|--------------------------|--------------------------|--------------------------|
|                         |                          |                          |                          |
|                         | [5AIP+H] <sup>+</sup> -a | [5AIP+H] <sup>+</sup> -b | [5AIP+H] <sup>+</sup> -c |
| Gas phase               | 39.2                     | 17.8                     | 27.4                     |
| Water                   | 78.1                     | 75.6                     | 76.5                     |
| Methanol                | 77.8                     | 74.7                     | 75.8                     |
| <b>CCS<sub>N2</sub></b> | <b>140.9</b>             | <b>136.5</b>             | <b>137.1</b>             |
|                         |                          |                          |                          |
|                         | [5AIP+H] <sup>+</sup> -d | [5AIP+H] <sup>+</sup> -e | [5AIP+H] <sup>+</sup> -f |
| Gas phase               | 38.2                     | 0.0                      | 2.3                      |
| Water                   | 86.1                     | 1.2                      | 0.0                      |
| Methanol                | 85.2                     | 0.7                      | 0.0                      |
| <b>CCS<sub>N2</sub></b> | <b>132.8</b>             | <b>150.2</b>             | <b>150.3</b>             |
|                         |                          |                          |                          |
|                         | [5AIP+H] <sup>+</sup> -g | [5AIP+H] <sup>+</sup> -h | [5AIP+H] <sup>+</sup> -i |
| Gas phase               | 6.3                      | 14.4                     | 31.9                     |
| Water                   | 1.8                      | 54.0                     | 64.2                     |
| Methanol                | 2.5                      | 52.5                     | 63.4                     |
| <b>CCS<sub>N2</sub></b> | <b>150.3</b>             | <b>137.5</b>             | <b>138.4</b>             |

**Figure S12.** Relative Gibbs free energies and calculated CCS<sub>N2</sub> values for possible protomers of [5AIP+H]<sup>+</sup>. Polarized Continuum Model (PCM) was used for calculations in solvents water and methanol. Gibbs energies are in kJ mol<sup>-1</sup>.

|                         |                          |                          |                          |
|-------------------------|--------------------------|--------------------------|--------------------------|
|                         |                          |                          |                          |
|                         | [5AIP-H] <sup>-</sup> -a | [5AIP-H] <sup>-</sup> -b | [5AIP-H] <sup>-</sup> -c |
| Gas phase               | 5.3                      | 0.0                      | 222.8                    |
| Water                   | 0.0                      | 1.9                      | 64.8                     |
| Methanol                | 0.0                      | 1.2                      | 69.2                     |
| <b>CCS<sub>N2</sub></b> | <b>151.1</b>             | <b>150.7</b>             | <b>176.5</b>             |

**Figure S13.** Relative Gibbs free energies and calculated CCS<sub>N2</sub> values for possible deprotomers of [5AIP-H]<sup>-</sup>. Polarized Continuum Model (PCM) was used for calculations in solvents water and methanol. Gibbs energies are in kJ mol<sup>-1</sup>.

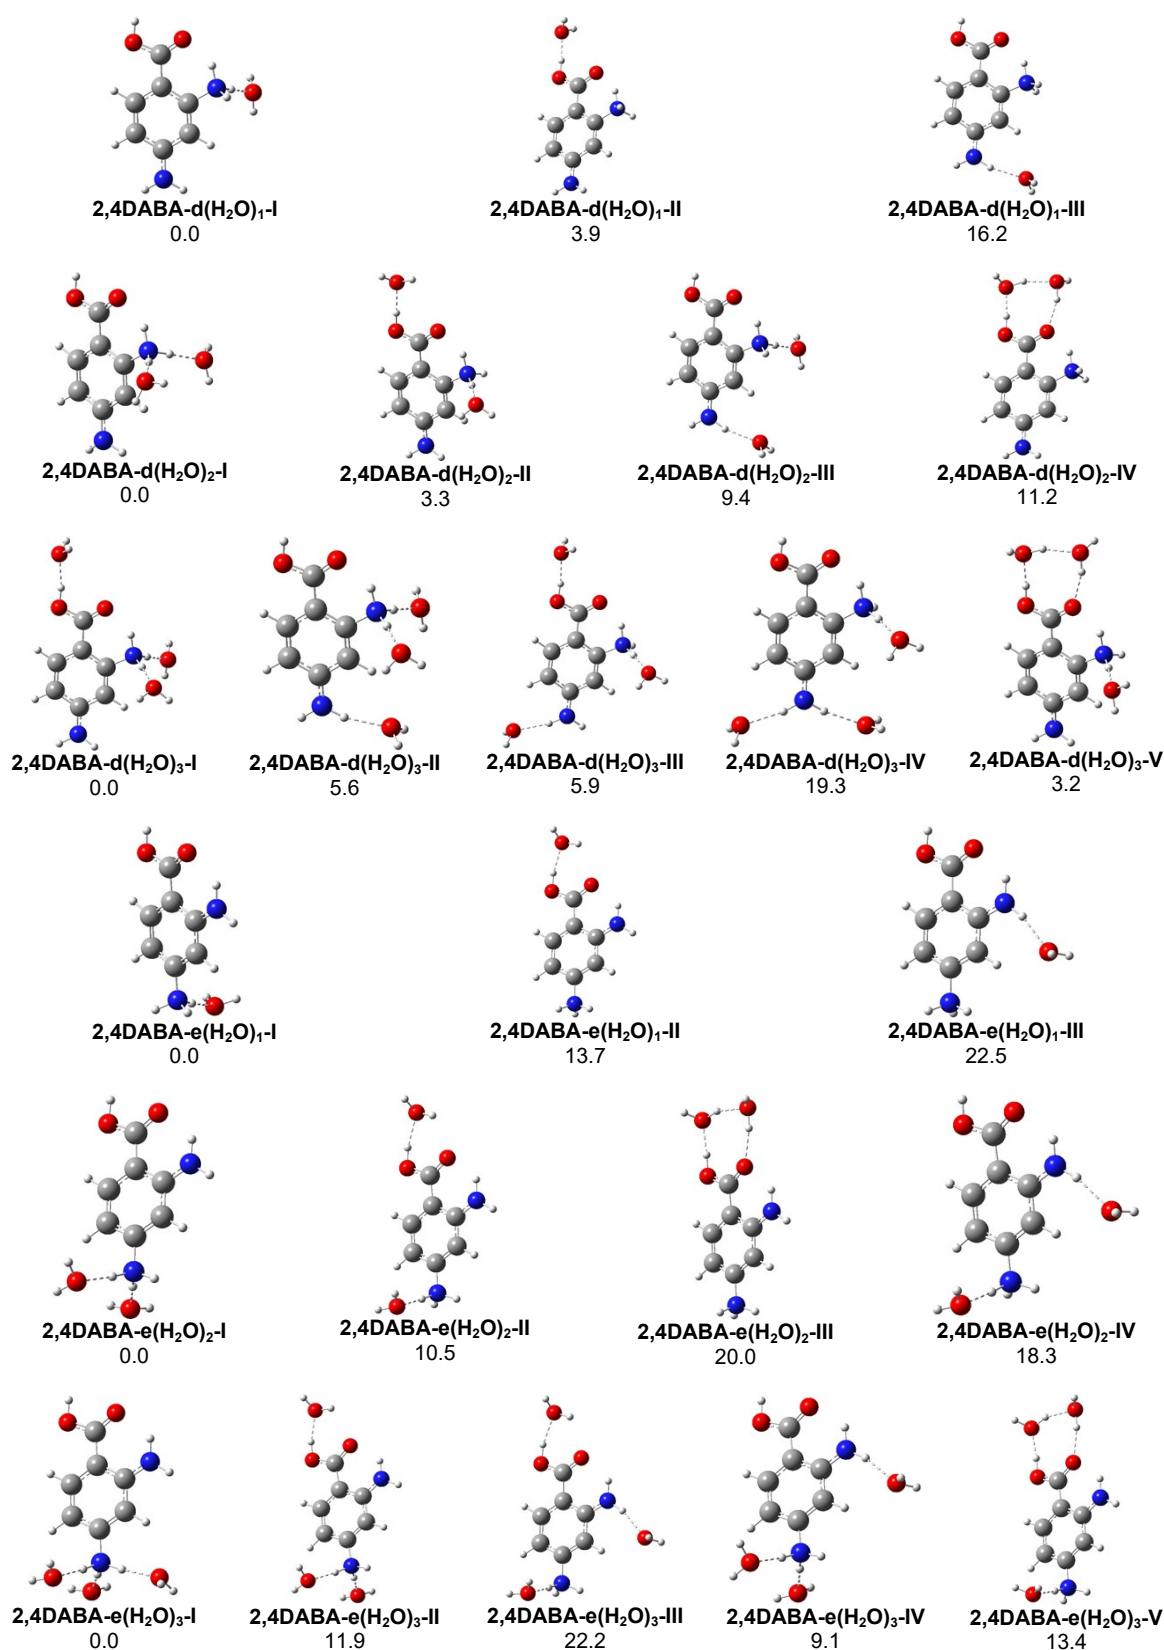

**Figure S14.** Comparison of the optimized structures and relative stabilities of [2,4-DABA+H]<sup>+</sup>-d(H<sub>2</sub>O)<sub>1,2,3</sub> and [2,4-DABA+H]<sup>+</sup>-e(H<sub>2</sub>O)<sub>1,2,3</sub> isomers in aqueous solution with dielectric constant of 78.25 using PCM model. The relative Gibbs energies are in kJ mol<sup>-1</sup>.

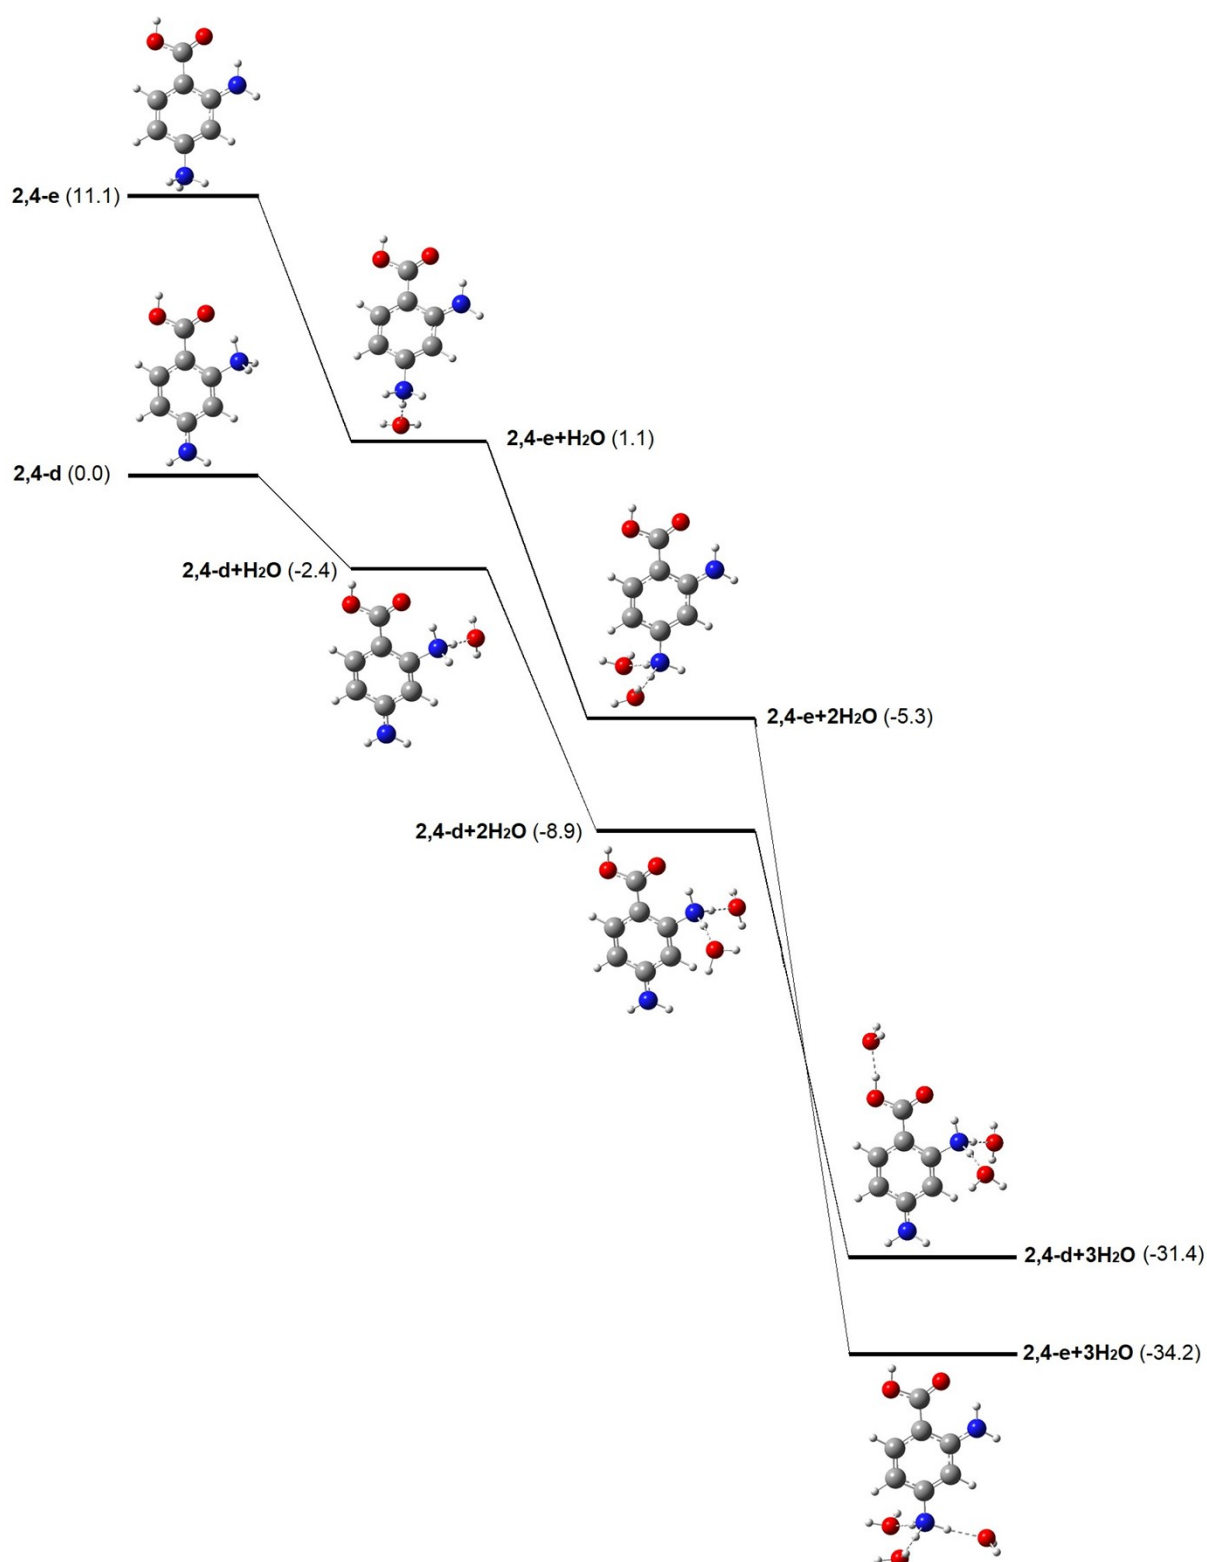

**Figure S15.** Stabilization of the 2,4-DABA N-protomers **d** and **e** (see **Figure S2**) due to micro-hydration (explicit hydration). The calculation in aqueous solution with implicit model of PCM ( $\epsilon=78.35$ ) shows that the isomer **d** is more stable. However, when hydrogen bonding interaction of water molecules in aqueous solution is considered, the most stable isomer is isomer **e** with the calculated  $CCS_{N2}$  of 139.6 Å<sup>2</sup> in good agreement with the experimental  $^{DT}CCS_{N2}$  value of 140.0 Å<sup>2</sup>. For the isomer **d**, the calculated  $CCS_{N2}$  is 129.7 Å<sup>2</sup>. Gibbs energies in parenthesis are in kJ mol<sup>-1</sup>.



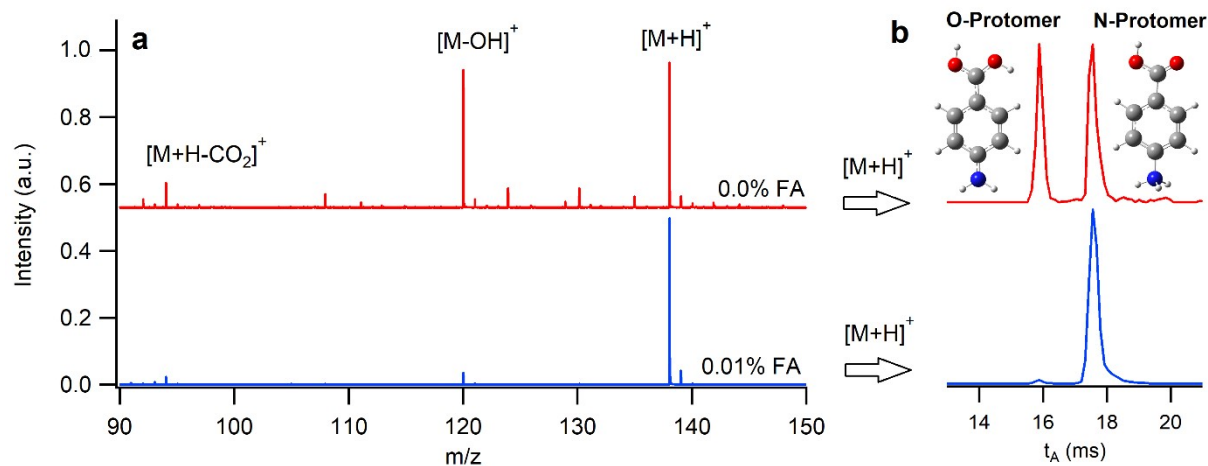

**Figure S16.** Experimental mass and IM spectra for *para*-amino benzoic acid (*p*-ABA) in  $H_2O:MeOH$  (50:50) with and without formic acid. With the addition of 0.01% (v/v) formic acid, the amine group is predominantly protonated in solution and very little O-protomer is observed.

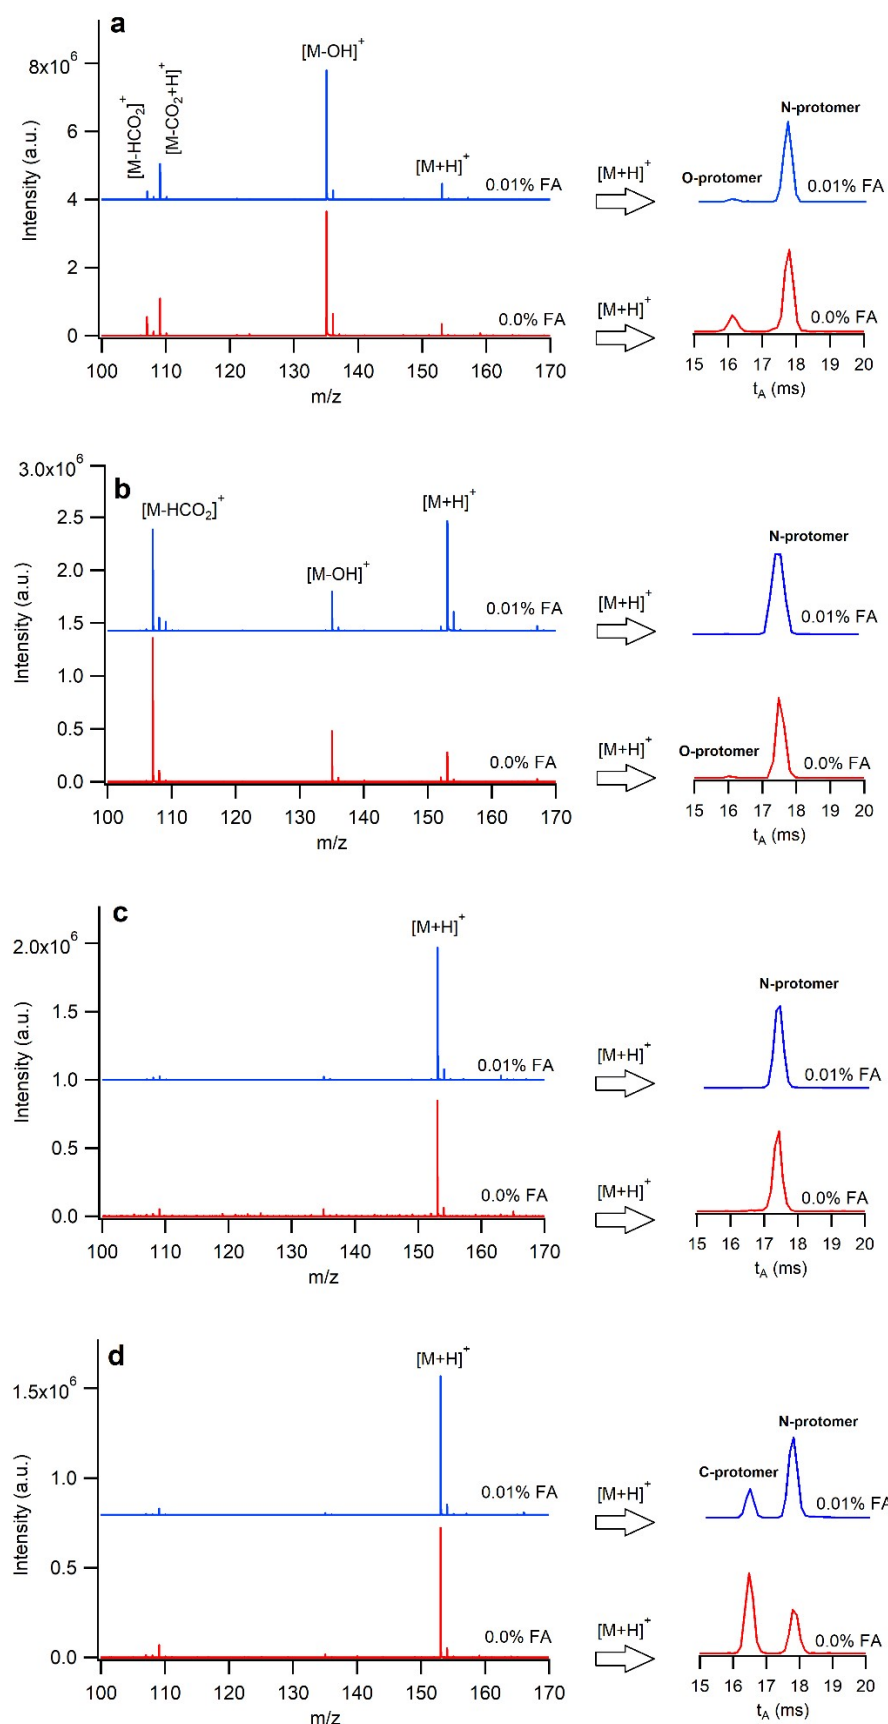

**Figure S17.**  $m/z$ -selected IM spectra and corresponding MS results for (a) 2,4-DABA, (b) 2,5-DABA, (c) 3,4-DABA, and (d) 3,5-DABA in  $H_2O:MeOH$  (50:50) without and with 0.01% FA.

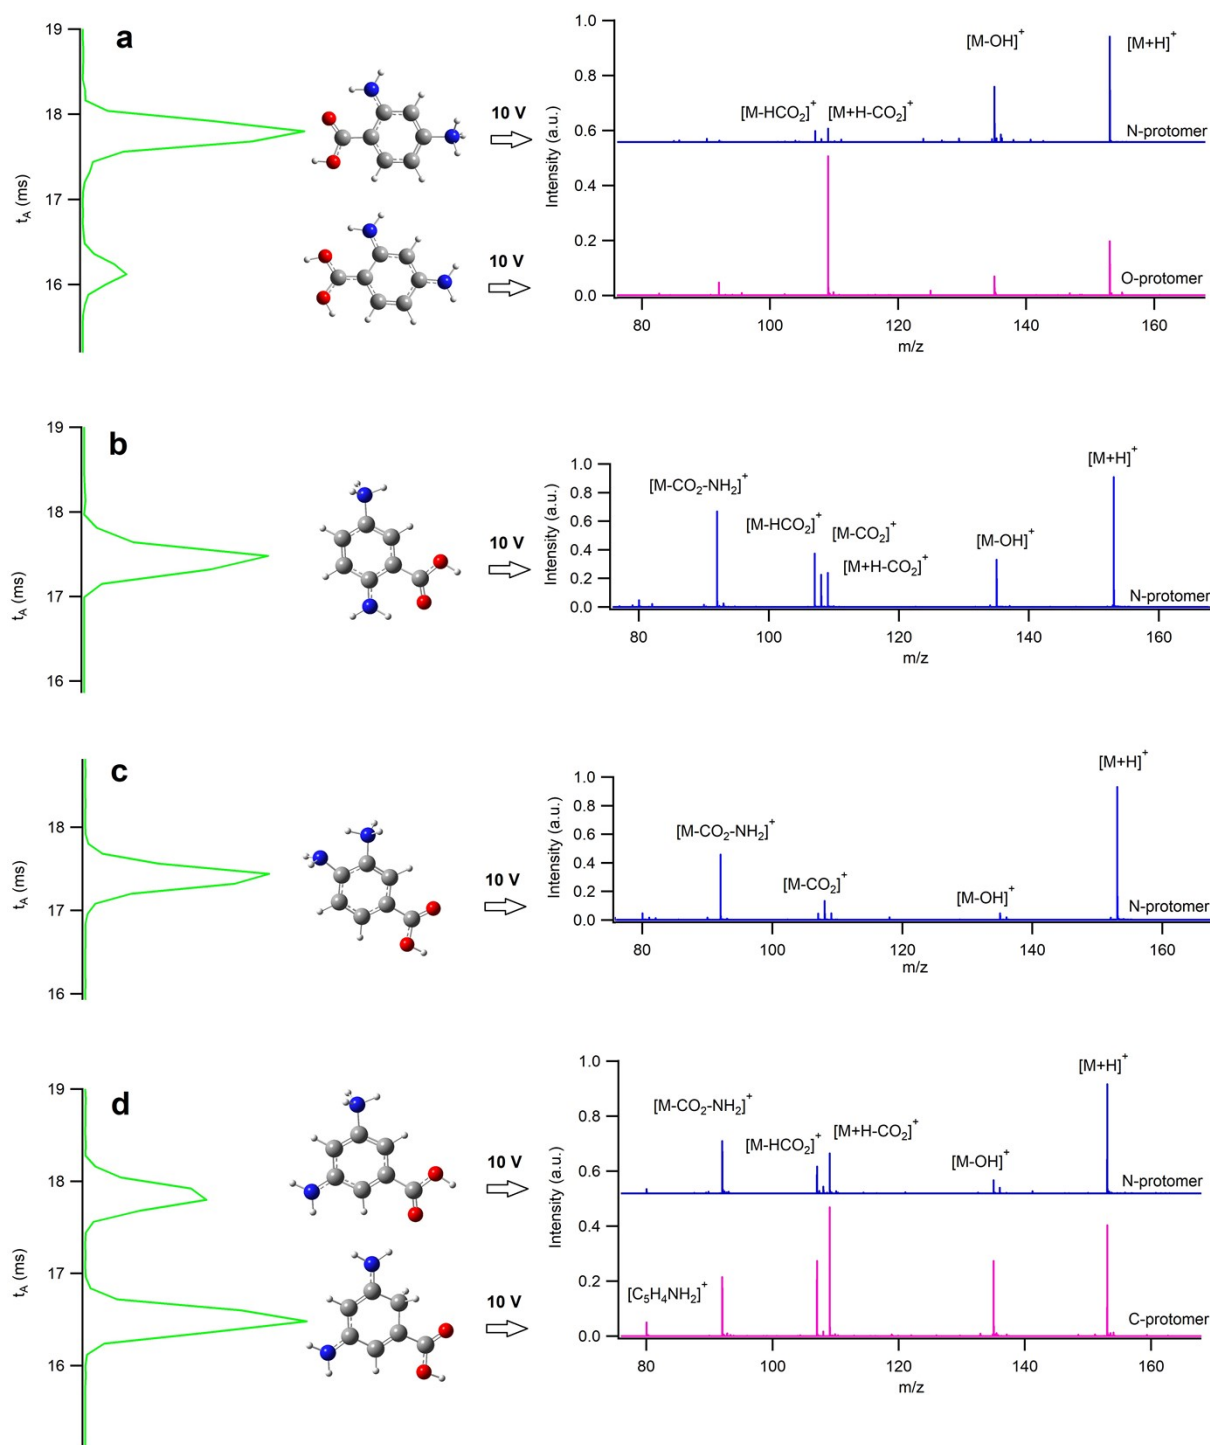

**Figure S18.** Comparison of HRMS fragment results for protomers of (a) 2,4-DABA and (b) 2,5-DABA (c) 3,4-DABA and (d) 3,5-DABA using a CID voltage of 10 V.

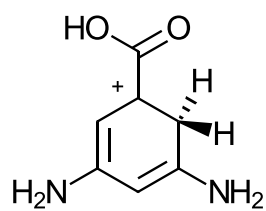

[3,5-DABA+H]<sup>+</sup>-I

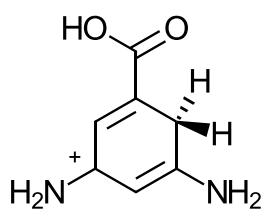

[3,5-DABA+H]<sup>+</sup>-II

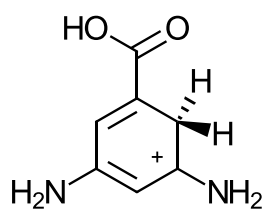

[3,5-DABA+H]<sup>+</sup>-III

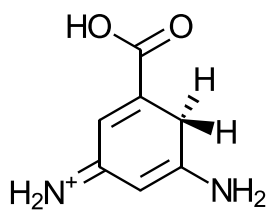

[3,5-DABA+H]<sup>+</sup>-IV

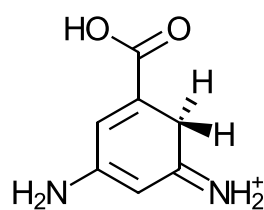

[3,5-DABA+H]<sup>+</sup>-V

**Figure S19.** Resonance stabilization of the C-protomer of 3,5-DABA. Structures **IV** and **V** show the participation of lone-pair electron of NH<sub>2</sub> group in the resonance of the positive charge.

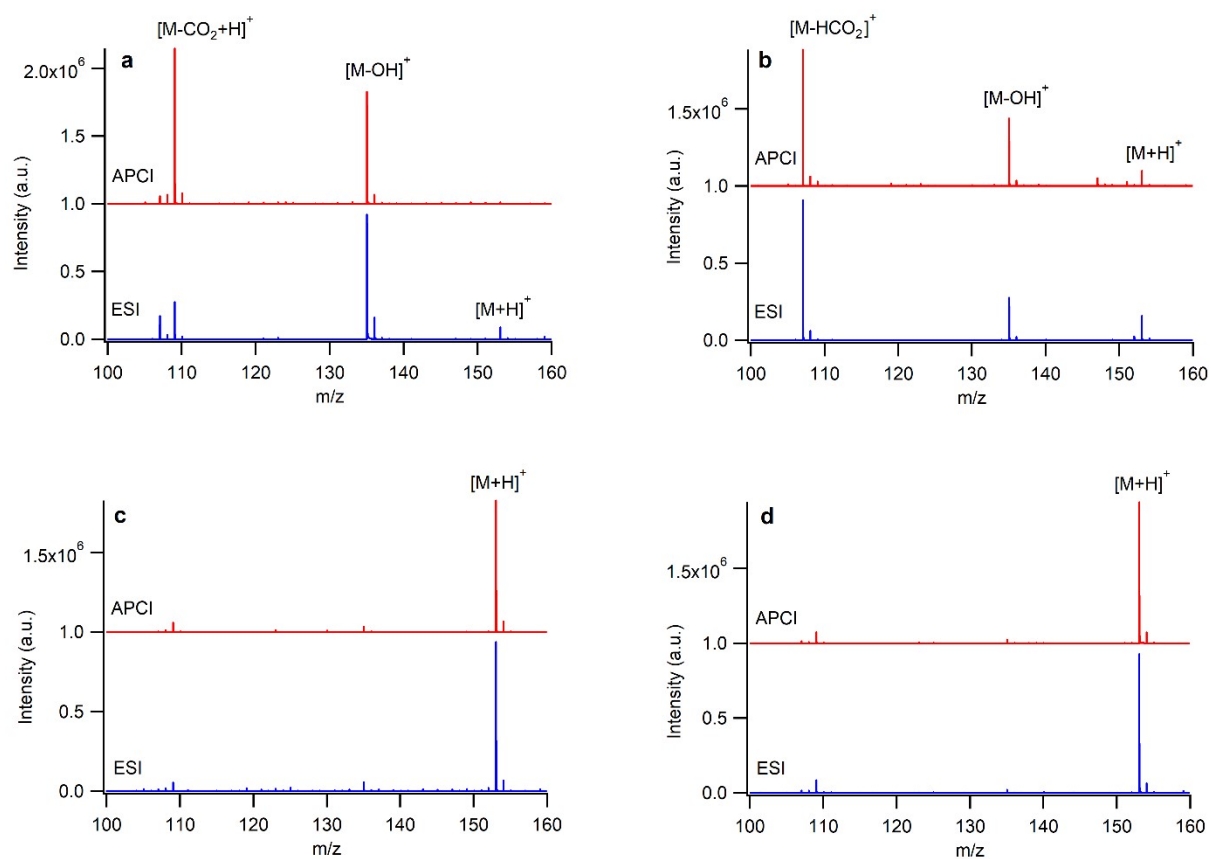

**Figure S20.** Comparison of mass spectra of (a) 2,4-DABA, (b) 2,5-DABA, (c) 3,4-DABA, and (d) 3,5-DABA ionized using APCI and ESI ion sources in  $\text{H}_2\text{O}:\text{CH}_3\text{OH}$  solvents.

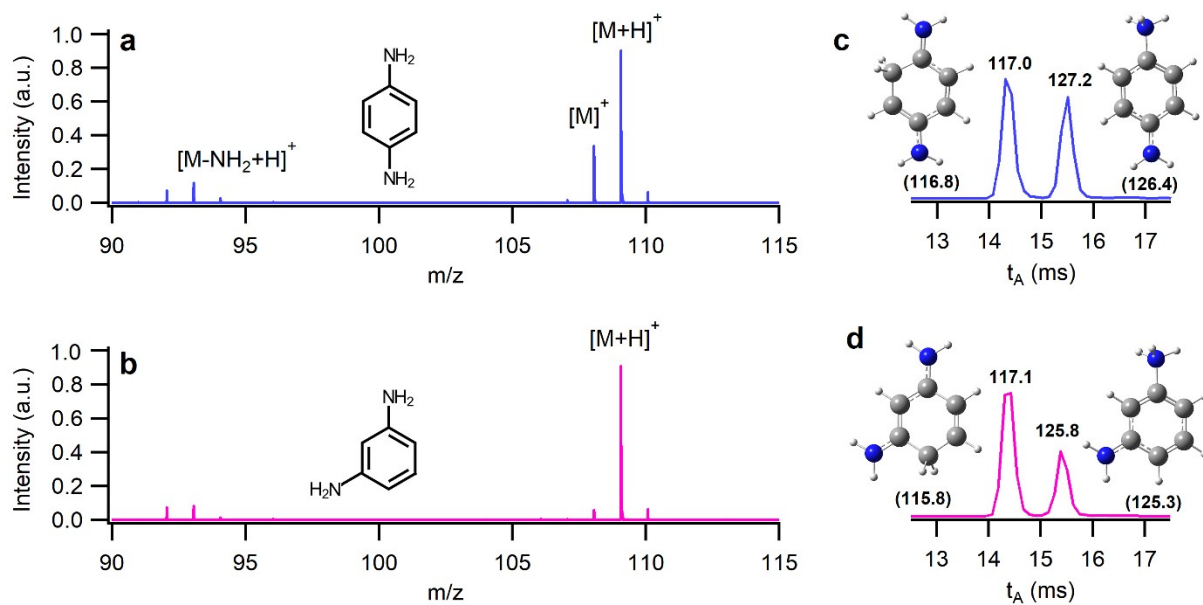

**Figure S21.** The mass spectra of (a) *p*-DAB and (b) *m*-DAB ionized by ESI with 0.01% FA. The  $m/z$ -selected IM spectra of (c) *p*-DAB and (d) *m*-DAB. The experimental and theoretical (numbers in parenthesis)  $CCS_{N_2}$  values are in Å<sup>2</sup>.

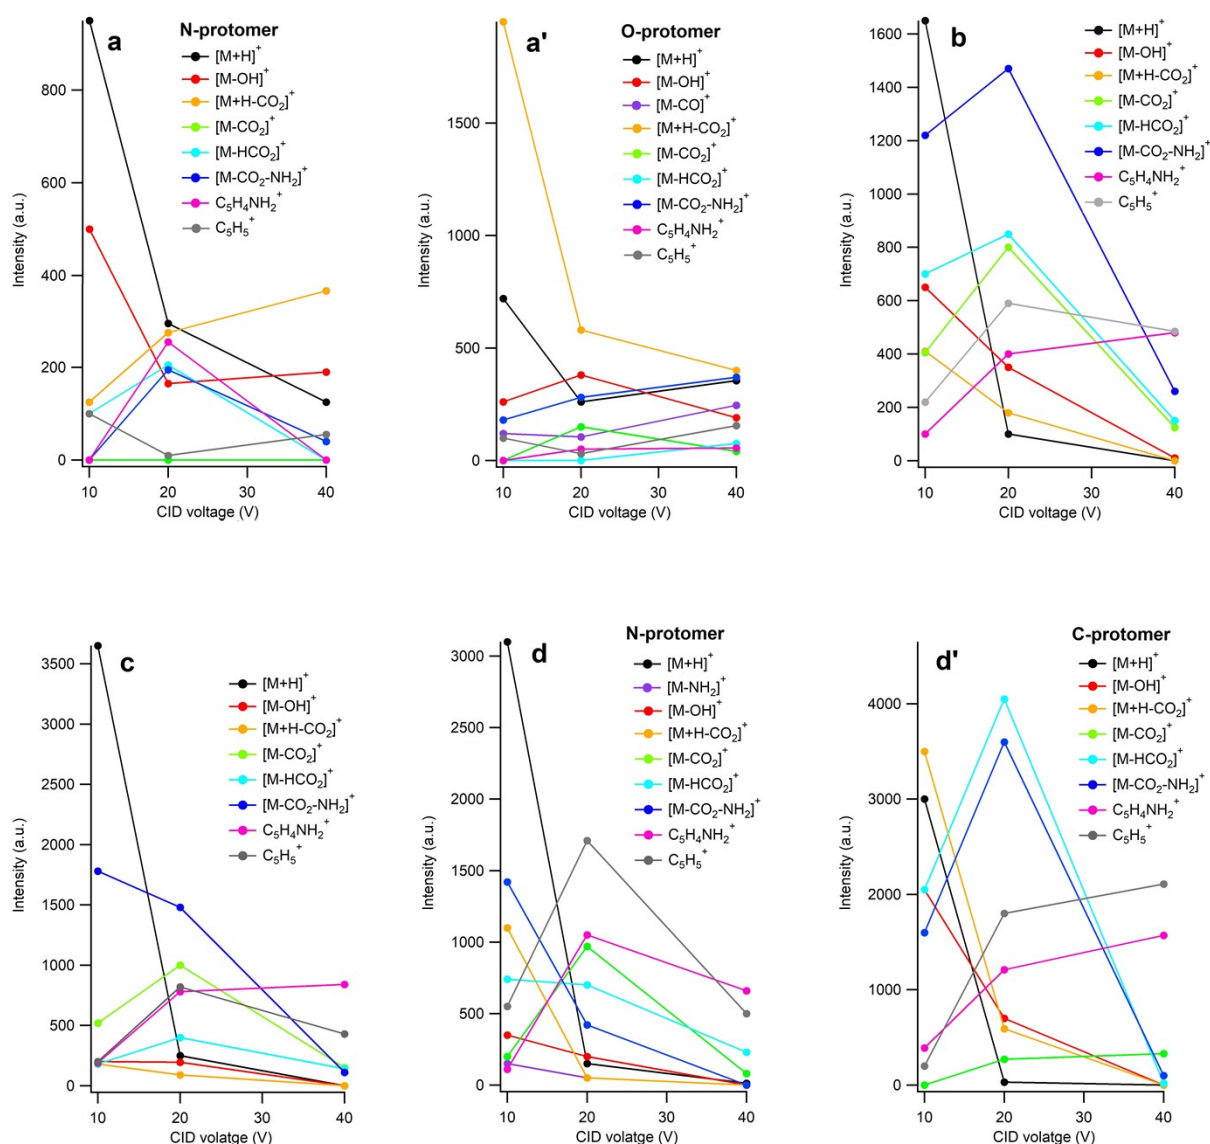

**Figure S22.** The intensity of fragment ions produced using post-IM CID for the protomers of (a and a') 2,4-DABA (N- and O-protomers), (b) 2,5-DABA (N-protomer), (c) 3,4-DABA (N-protomer), and (d and d') 3,5-DABA (N- and C-protomers) with respect to the applied CID voltage.

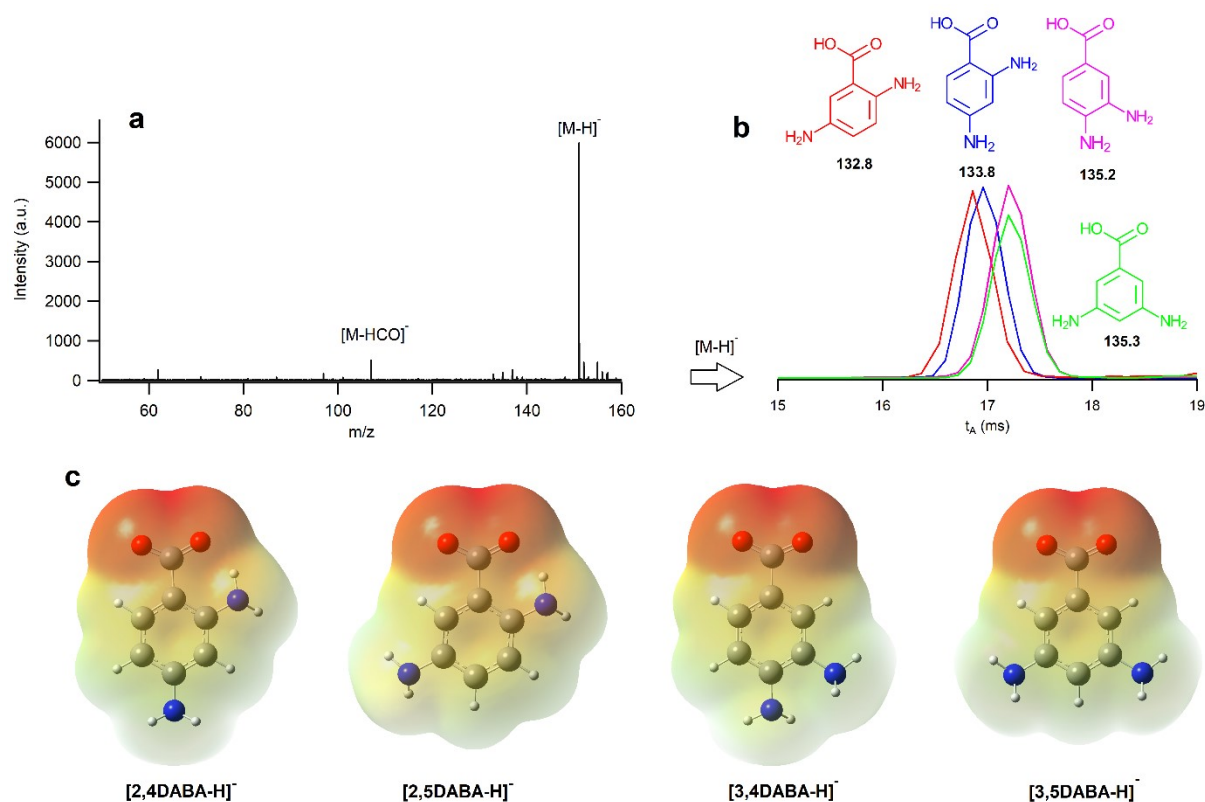

**Figure S23.** (a) Typical mass spectrum (3,5-DABA) for diamino benzoic acids in negative mode. (b) Experimental IM spectra for all DABA isomers. (c) The ESP maps for the  $[M-H]^-$  ions of diamino benzoic acids. The numbers are experimental  $^{DT}CCS_{N2}$  in  $\text{\AA}^2$ .



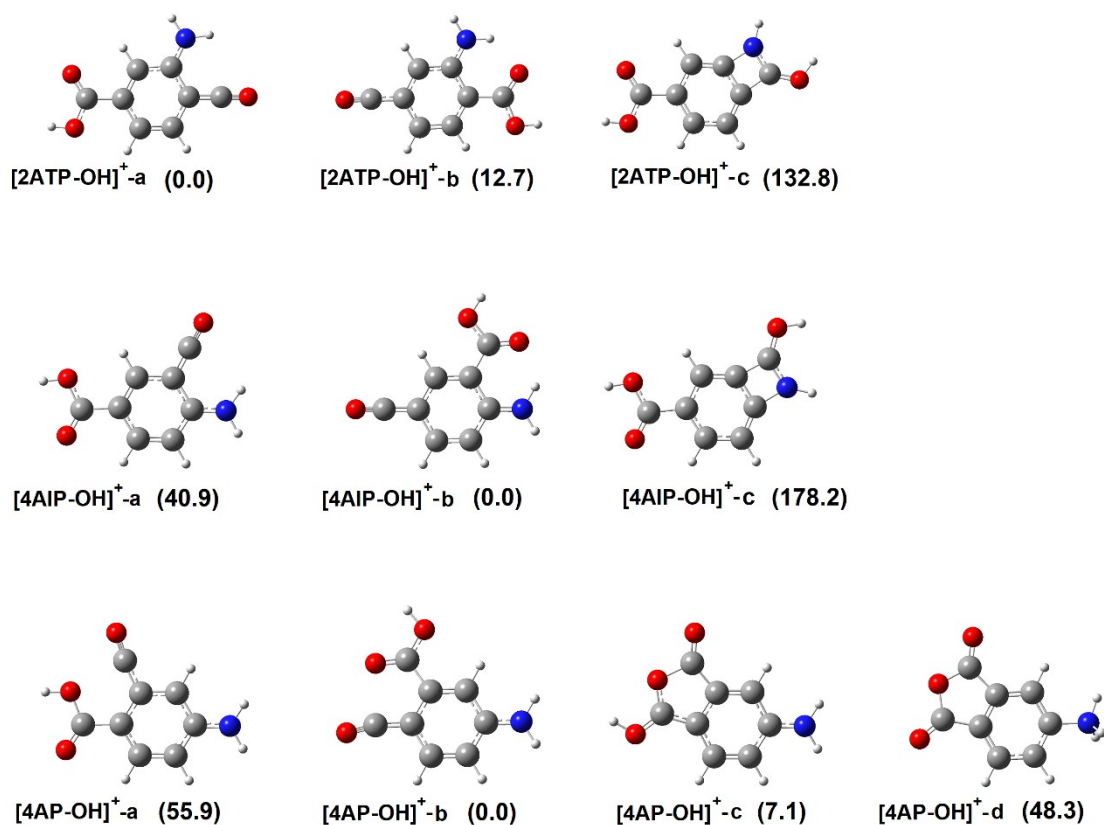

**Figure S24.** Comparison of relative Gibbs free energies of different isomers of [M-OH]<sup>+</sup> ions of 2ATP, 4AIP, and 4AP in the gas phase. The Gibbs energies are in kJ mol<sup>-1</sup>.

**Table S2.** The calculated  $\Delta H$  and  $\Delta G$  values for deprotonation of diaminobenzoic acids (DABA) and aminophthalic acids (APA) in the gas phase, in methanol, and in water solvents. For the APA isomers, the most acidic site is reported. The energies are in  $\text{kJ mol}^{-1}$ .

| Compound | Gas phase  |            | Aqueous solution |            | Methanol   |            |
|----------|------------|------------|------------------|------------|------------|------------|
|          | $\Delta H$ | $\Delta G$ | $\Delta H$       | $\Delta G$ | $\Delta H$ | $\Delta G$ |
| 2,4-DABA | 1437.5     | 1406.6     | 1205.3           | 1174.0     | 1210.3     | 1178.9     |
| 2,5-DABA | 1422.7     | 1391.3     | 1196.4           | 1164.8     | 1201.2     | 1169.3     |
| 3,4-DABA | 1442.8     | 1409.8     | 1202.4           | 1170.1     | 1207.6     | 1175.3     |
| 3,5-DABA | 1437.9     | 1405.7     | 1196.5           | 1165.2     | 1201.7     | 1170.8     |
| 2ATP     | 1394.7     | 1364.5     | 1186.5           | 1155.0     | 1191.0     | 1159.5     |
| 4AIP     | 1395.1     | 1364.8     | 1187.7           | 1156.8     | 1192.0     | 1161.2     |
| 4AP      | 1334.2     | 1304.5     | 1147.9           | 1120.2     | 1151.5     | 1123.8     |
| 5AIP     | 1411.4     | 1379.1     | 1189.1           | 1155.0     | 1194.0     | 1160.4     |

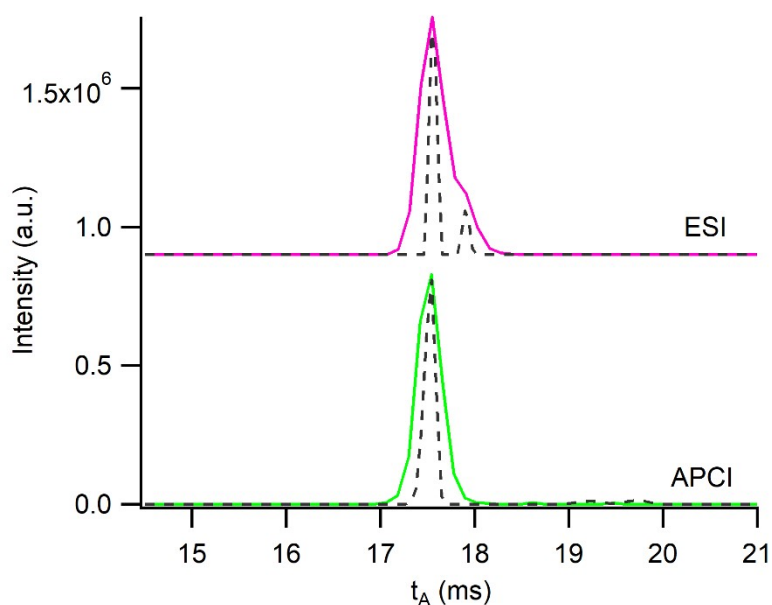

**Figure S25.** Comparison of the  $m/z$ -selected IM spectra of  $[2\text{ATP-H}]^-$  ion ionized in ESI and APCI ion sources. The dash line spectra are the IM spectra achieved with high resolution demultiplexing (HRdm).
